# Supplementary material for: Impact of non-LTR retrotransposons in the differentiation and evolution of anatomically modern humans
Source: PubMed Central journal article supplement (PMC6094920; doi:10.1186/s13100-018-0133-4), 2018-08-15

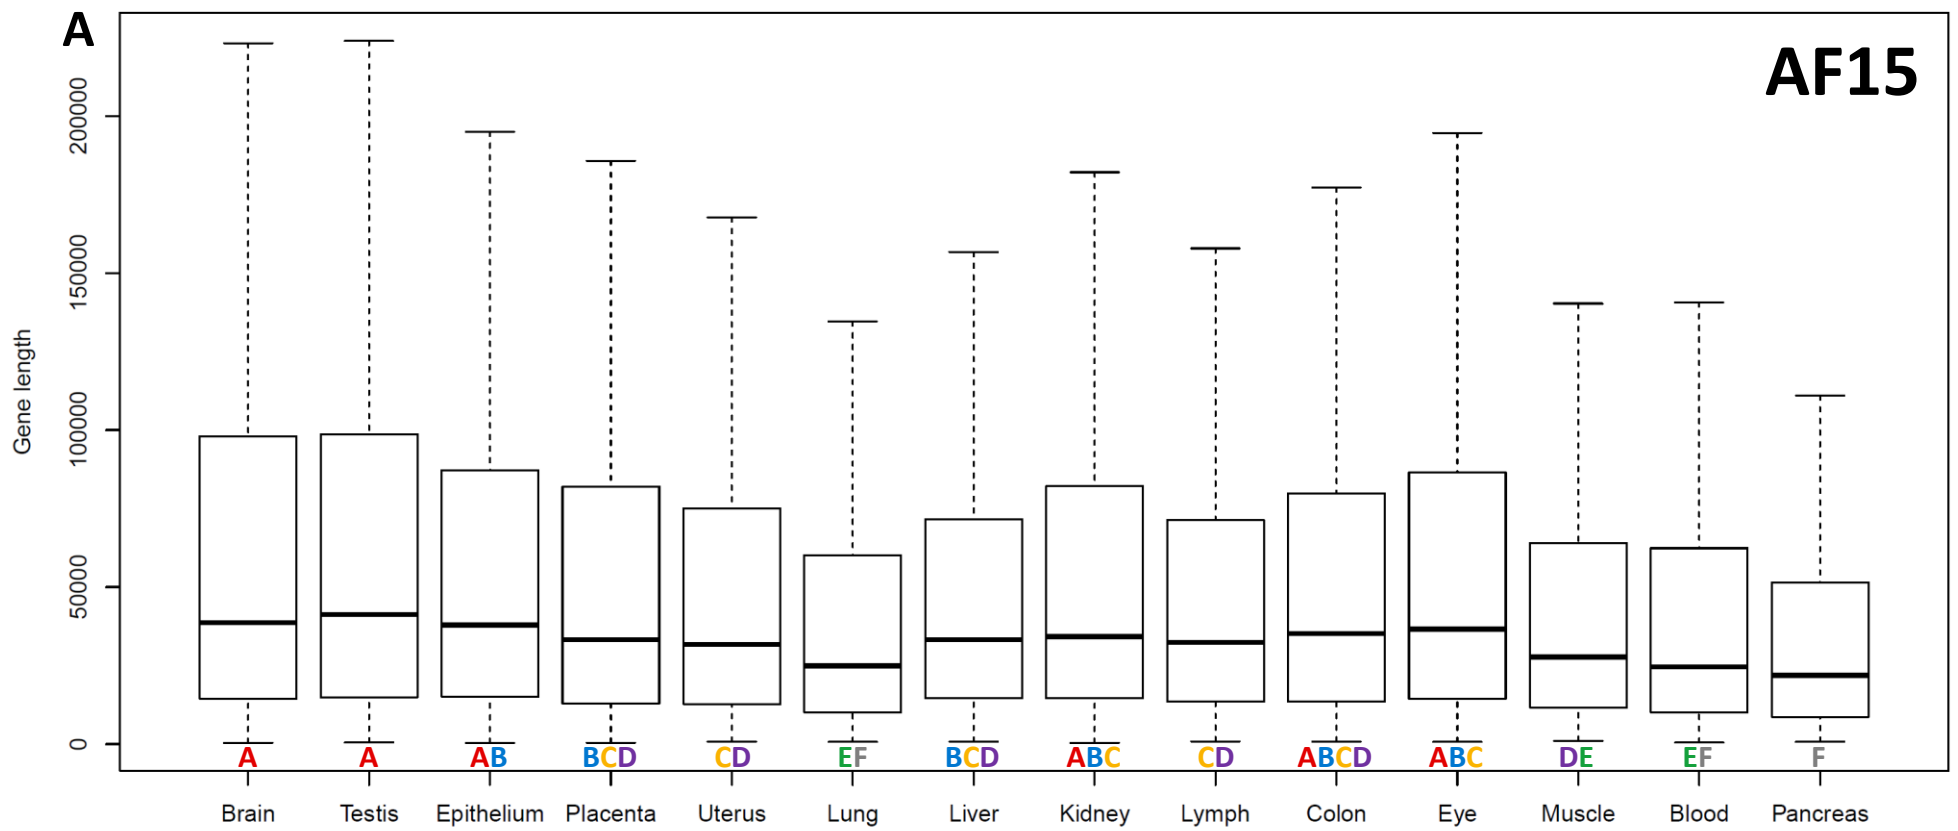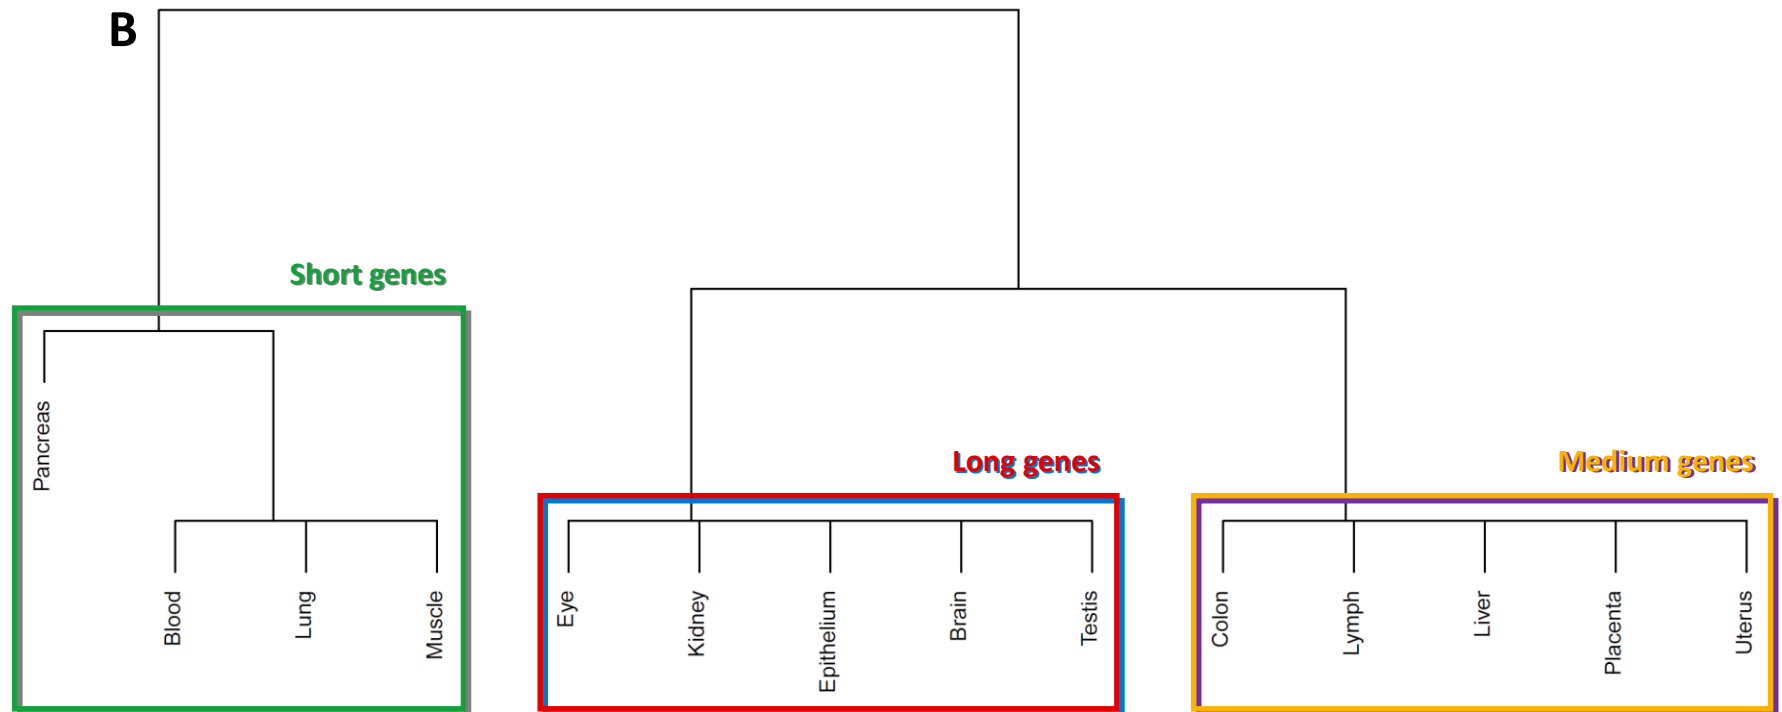

Supplement: 13100_2018_133_MOESM15_ESM.pdf [file 13100_2018_133_MOESM15_ESM.pdf]
